# Supplementary material
Source: publisher figshare collection journal article supplement (https://sage.figshare.com/ndownloader/files/17505329)
Supplement: Supplementary file 1 [file 17505329]

## Appendix 1

### *Target phrasal verbs in the 40-text reading corpus*

| Rank | Phrasal verb    | Target meaning | Semantic category | Raw frequency | % of total phrasal verbs |
|------|-----------------|----------------|-------------------|---------------|--------------------------|
| 1    | carry out (36)  | complete       | figurative        | 9             | 5.45                     |
| 2    | go on (1)       | proceed        | literal           | 8             | 4.85                     |
| 3    | take on (15)    | accept         | figurative        | 8             | 4.85                     |
| 4    | set up (11)     | present        | figurative        | 7             | 4.24                     |
| 5    | take over (37)  | assume         | literal           | 7             | 4.24                     |
| 6    | end up (18)     | finish         | figurative        | 6             | 3.64                     |
| 7    | open up         | expand         | figurative        | 6             | 3.64                     |
| 8    | give up (16)    | abandon        | literal           | 5             | 3.03                     |
| 9    | grow up (10)    | mature         | literal           | 5             | 3.03                     |
| 10   | make up (17)    | constitute     | figurative        | 5             | 3.03                     |
| 11   | set out (64)    | establish      | literal           | 5             | 3.03                     |
| 12   | blow up (99)    | explode        | literal           | 4             | 2.42                     |
| 13   | clean up (65)   | sanitize       | figurative        | 4             | 2.42                     |
| 14   | come up (4)     | produce        | figurative        | 4             | 2.42                     |
| 15   | pay off (78)    | liquidate      | literal           | 4             | 2.42                     |
| 16   | sign up         | register       | literal           | 4             | 2.42                     |
| 17   | buy up          | acquire        | literal           | 3             | 1.82                     |
| 18   | figure out (21) | understand     | literal           | 3             | 1.82                     |
| 19   | lay off         | disemploy      | figurative        | 3             | 1.82                     |
| 20   | lay out (73)    | present        | figurative        | 3             | 1.82                     |
| 21   | point out (9)   | indicate       | figurative        | 3             | 1.82                     |
| 22   | rule out (123)  | exclude        | figurative        | 3             | 1.82                     |
| 23   | scale up        | maximize       | literal           | 3             | 1.82                     |
| 24   | shore up        | support        | figurative        | 3             | 1.82                     |
| 25   | shut down (66)  | close          | figurative        | 3             | 1.82                     |
| 26   | water down      | attenuate      | figurative        | 3             | 1.82                     |
| 27   | build up (84)   | increase       | figurative        | 2             | 1.21                     |
| 28   | gobble up       | consume        | figurative        | 2             | 1.21                     |
| 29   | ramp up         | intensify      | figurative        | 2             | 1.21                     |
| 30   | turn out (12)   | prove          | figurative        | 2             | 1.21                     |

*Note.* Numbers in parentheses indicate the frequency ranking order in the list of 150 most frequently used phrasal verbs in English (at least 10 tokens per million words) (Liu, 2011).

## Appendix 2

*Registration window in the ICALL system*

WERTi

Contact

Please choose a username that does not betray your real name or identity. For e.g.: student23, person2, pupil42 would be good usernames.

Username

Email

Enter desired password

Confirm password

Sign Up

## Appendix 3

*Sample of test items* (based on Schmitt and Redwood, 2011)

A. Productive item on the phrasal verb *put up*:

Some skeptical people have p  o  that self-driving cars can be dangerous. (indicate)

B. Receptive item on the phrasal verb *put up*:

Some skeptical people have \_\_\_\_\_ that self-driving cars can be dangerous. (indicate)

☐ ?

☐ ruled out

☐ held out

☐ pointed out

☐ come out



## Appendix 4

### *Cognitive tests*

#### A. *Working memory*

Automated Operation Span (OSpan; Unsworth et al., 2005). Online version with Klingon characters based on Hicks et al. (2016)

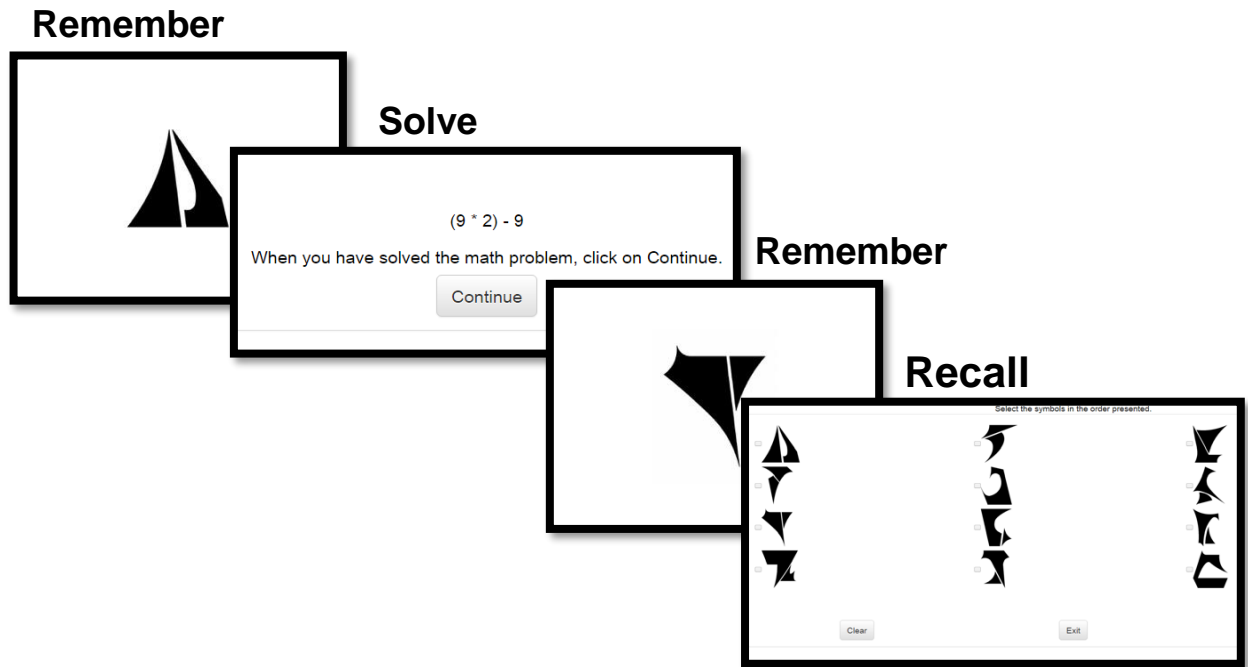

#### B. *Visual declarative memory:*

Continuous Visual Memory Task (CVMT; Trahan and Larrabee, 1988)

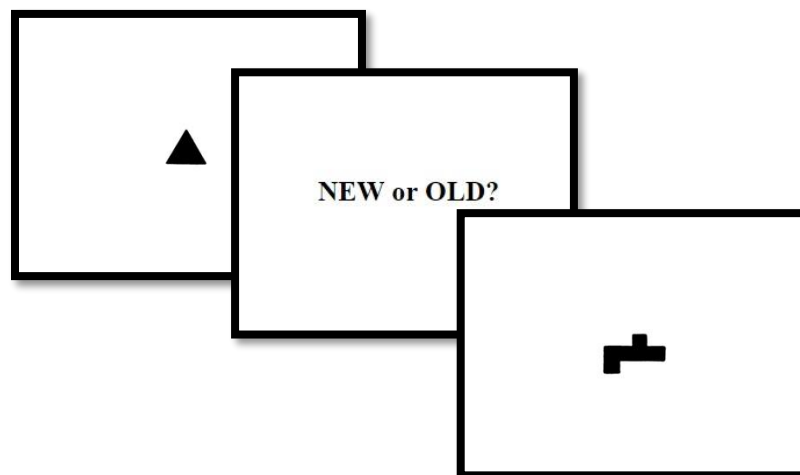



*C. Verbal declarative memory*

Modern Language Aptitude Test, subtest 5, word pair associates (MLAT5; Carroll and Sapon, 1959)

## MODERN LANGUAGE APTITUDE TEST

You are going to take a test to determine how easily and rapidly you learn a foreign language. Do your best, regardless of whether or not you think you are good at learning foreign languages.

Your first task is to MEMORIZE some Kurdish-English vocabulary. You will be given TWO minutes to study the vocabulary on the next page. At the end of the two minutes, you will complete some filling-in-the-blank exercises, which will help you memorize the vocabulary. After filling the blanks, continue studying if there is still time.

Go ahead now and start memorizing the vocabulary. You will be tested on this later.

Please click on the "Start" button to proceed.

Start

### Appendix 5

*Example of C-test*

Example:

**How Lakeland wind farm plan has environmentalists in a spin**

On maps, you can already see it: a circle, almost a collar, clearly beginning to take shape on the borders of Britain's largest and most visited national park, the Lake District. It is a circle of streets, consisting of wind farms, working as planned: congregations of enormous windmills stand on hills where they can catch the wind to produce electricity, a wind which is visible for miles. So many are already operating, so many are under construction, others are being evaluated, a few have been turned down. But what is certain is that they represent only the first of many more to come on the Lake District borders in the Cumbrian hills, and an increasing number of local people fear they will ruin huge swaths of some of the loveliest landscape in England, and have a dire effect on the national park itself.

Remember, you must not consult any materials at all when you are taking the test. You now have **30 minutes** to complete **5 texts**.

[START THE TEST](#)



## Appendix 6

### Sample of treatment pages

#### A. Meaning-focused condition:

 **REUTERS**

 [Business](#) [Markets](#) [World](#) [UK](#) [Tech](#) [Money](#) [Commentary](#) [Breakingviews](#) [Sport](#) [Life](#)  [Pictures](#)

First read the article, then click the button at the end of the article to move on to the questionnaire.

RETIREMENT NEWS | Mon Aug 15, 2016 | 9:34am EDT

# Are you saving too much for your kids' college?

By Chris Taylor | NEW YORK

NEW YORK Parents these days are expected to pull off a financial Mission: Impossible. Cover the monthly bills, pay down debts, help elderly parents, save for retirement and for kids' college costs, all with incomes that may have been flat for years. Facing such a demanding feat, here's some advice you may not often hear: When it comes to your kids' college costs, maybe you are doing too much.

To wit, 42 percent of parents are actually losing sleep over college costs, up from 28 percent just two years ago, according to new data from the Parents, Kids & Money survey by Baltimore-based money managers T. Rowe Price.

#### B. Form-focused condition:

 **REUTERS**

 [Business](#) [Markets](#) [World](#) [UK](#) [Tech](#) [Money](#) [Commentary](#) [Breakingviews](#) [Sport](#) [Life](#)  [Pictures](#)  [Video](#)

First read the article, then click the button at the end of the article to move on to the questionnaire.

RETIREMENT NEWS | Mon Aug 15, 2016 | 9:34am EDT

# Are you saving too much for your kids' college?

NEW YORK Parents these days are expected to pull off a financial Mission: Impossible. Cover the monthly bills, pay around debts, help elderly parents, save for retirement and for kids' college costs, all with incomes that may have been flat for years.

Facing such a demanding feat, here's some advice you may not often hear: When it comes to your kids' college costs, maybe you are doing too much.

To wit, 42 percent of parents are actually losing sleep over college costs, up from 28 percent just two years ago, according to new data from the Parents, Kids & Money survey by Baltimore-based money managers T. Rowe Price.

Of parents surveyed, 57 percent are willing to take off on down through at least \$25,000 of college debt on behalf of their kids, and 19 percent are willing to borrow \$100,000 or more.

More parents (58 percent) report having college-savings plans for their kids, rather than retirement savings for themselves (54 percent).

"Parents are more stressed than ever about college costs," says Marty Allenbaugh, a senior marketer for T. Rowe Price. "Parents are more stressed than ever about college costs," says Marty Allenbaugh, a senior marketer for T. Rowe Price.



## Appendix 7

### *Sample of reading questionnaire*

| Reading Questionnaire                                                                                                                                                                                                                                                                                                                                                                                                                                                                                                                                     |
|-----------------------------------------------------------------------------------------------------------------------------------------------------------------------------------------------------------------------------------------------------------------------------------------------------------------------------------------------------------------------------------------------------------------------------------------------------------------------------------------------------------------------------------------------------------|
| <p>What is the main idea of the article?</p> <p><input type="radio"/> In a survey, parents indicated that they were more stressed than ever about college costs.</p> <p><input type="radio"/> According to the article, parents may be saving too much money for their children's college.</p> <p><input type="radio"/> In a survey, over 50 percent of parents indicated that they were losing sleep over college costs.</p> <p><input type="radio"/> According to the article, parents may not be saving money enough for their children's college.</p> |
| Feedback Questionnaire                                                                                                                                                                                                                                                                                                                                                                                                                                                                                                                                    |
| <p>Reading this text was:</p> <p>very easy <input type="radio"/> 1 <input type="radio"/> 2 <input type="radio"/> 3 <input type="radio"/> 4 <input type="radio"/> 5 very difficult</p>                                                                                                                                                                                                                                                                                                                                                                     |
| <p>How much did you enjoy reading this text?</p> <p>very little <input type="radio"/> 1 <input type="radio"/> 2 <input type="radio"/> 3 <input type="radio"/> 4 <input type="radio"/> 5 very much</p>                                                                                                                                                                                                                                                                                                                                                     |
| <p>How familiar was the general topic to you?</p> <p>very little <input type="radio"/> 1 <input type="radio"/> 2 <input type="radio"/> 3 <input type="radio"/> 4 <input type="radio"/> 5 very much</p>                                                                                                                                                                                                                                                                                                                                                    |
| <p>Feel free to write any other comments</p> <div></div>                                                                                                                                                                                                                                                                                                                                                                                                                                                                                                  |

Submit
